# Supplementary material for: Prevalence and risk indicators of first-wave COVID-19 among oral health-care workers: A French epidemiological survey
Source: PubMed Central journal article supplement (PMC7877573; doi:10.1371/journal.pone.0246586), 2021-02-11

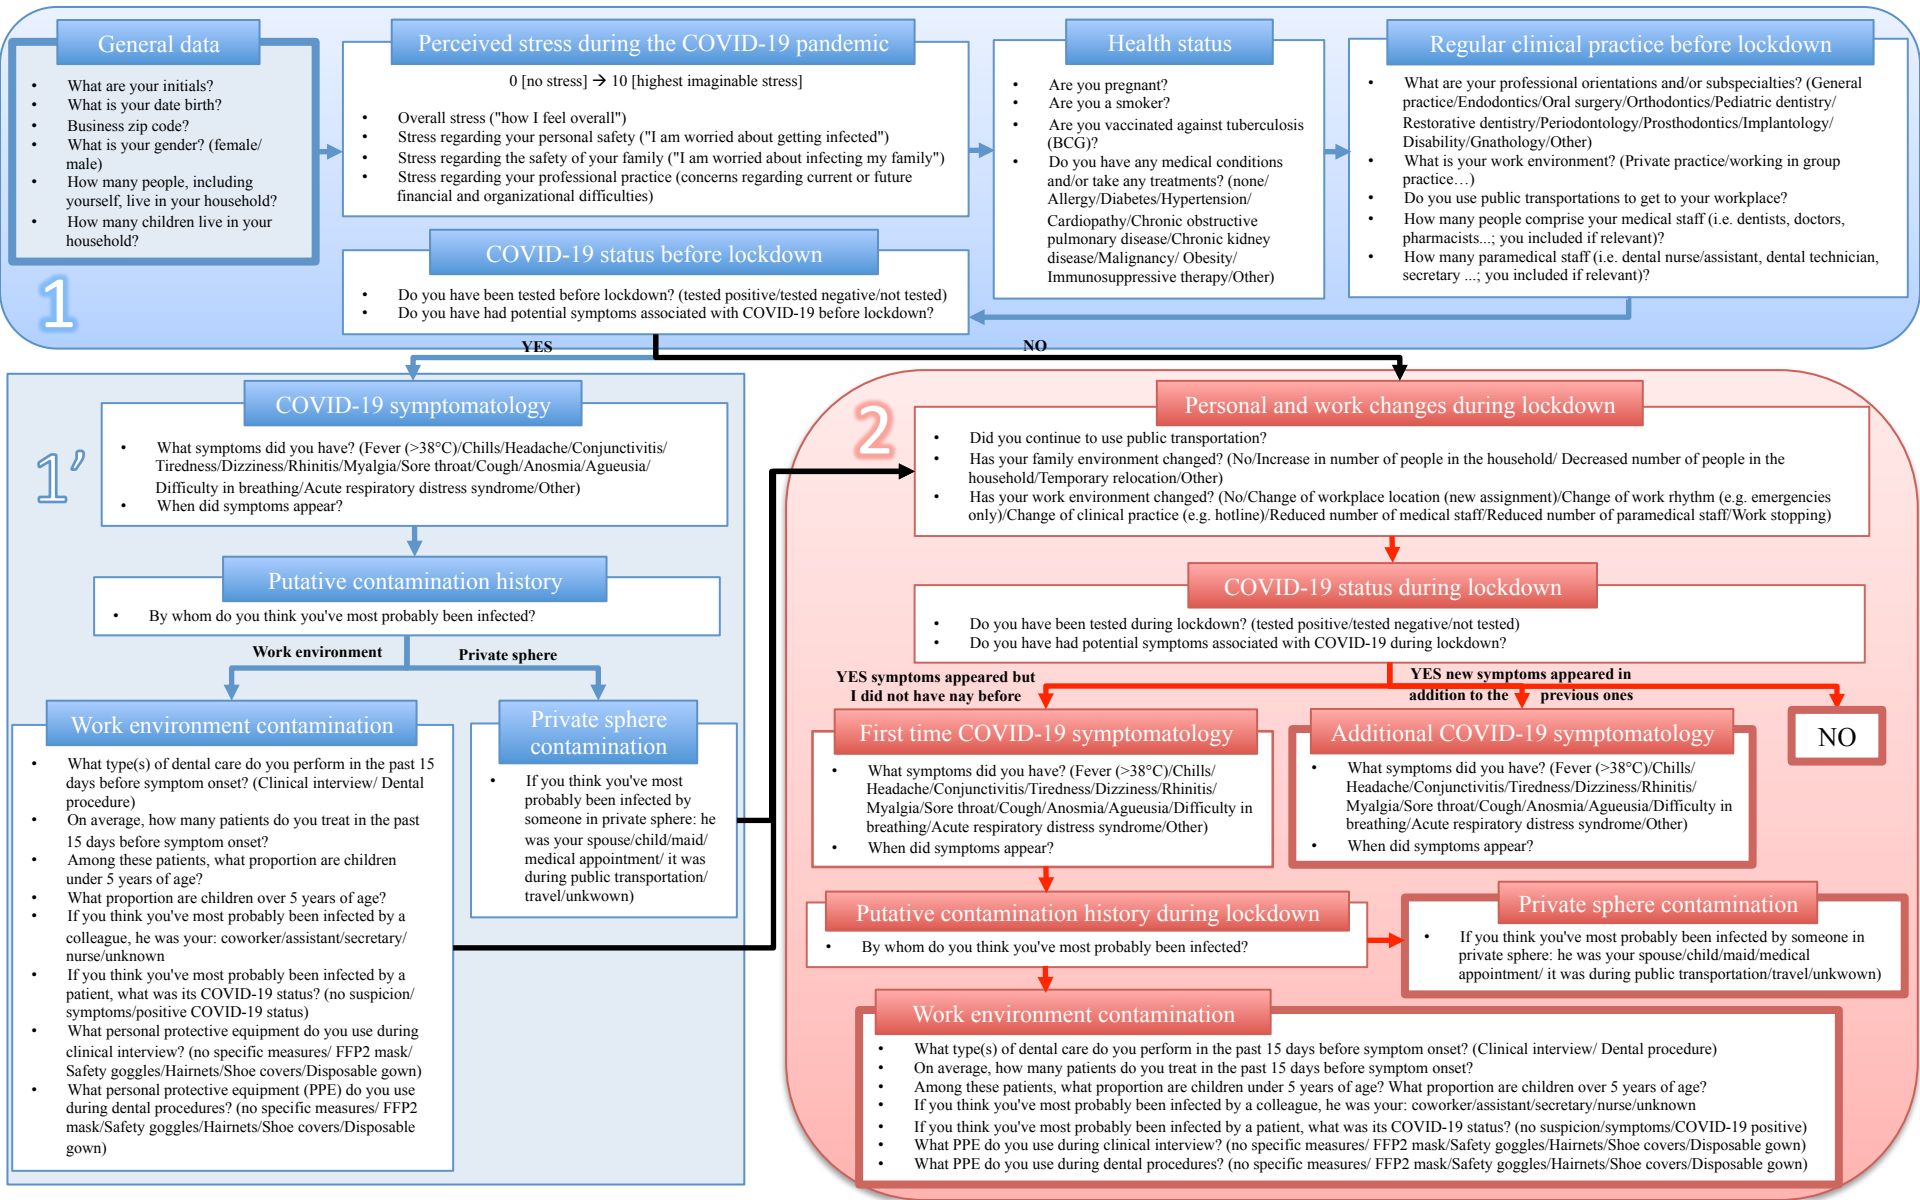

Supplement: pone.0246586.s006.pdf [file pone.0246586.s006.pdf]
